# Supplementary material for: Multiperspektivität im Multiplikatorenansatz
Source: Springer Nature journal article supplement (doi:10.1007/s11553-022-00978-6), 2022-09-14
Supplement: MOESM1 [file 23497284]

## Kurzfragebogen Eltern

B = befragte Person

[Frage 1]

Wenn Sie gern mehr über das Thema Kindersicherheit erfahren möchten – wo würden Sie gezielt nach solchen Informationen suchen oder wen würden Sie danach fragen? Bitte nennen Sie bis zu drei verschiedene Quellen, das können Medienangebote, Personen oder auch Organisationen sein.

**B:** 1. (offene Aufzählung einfügen)

2. (offene Aufzählung einfügen)

3. (offene Aufzählung einfügen)

[Frage 2]

Man kann ja nicht nur aktiv nach Informationen suchen, sondern auch zufällig darauf stoßen. Wo stoßen Sie besonders häufig auf Informationen zur Sicherheit von Kindern? Bitte nennen Sie bis zu drei verschiedene Quellen.

**B:** 1. Ich bin noch nie zufällig auf Informationen zur Sicherheit von Kindern gestoßen.

2. Informationsquelle: (offene Aufzählung einfügen)

[Frage 3]

Gibt es ganz allgemein noch weitere Quellen, von denen Sie sich mehr Informationen zum Thema Kindersicherheit wünschen würden?

**B:** 1. Nein

2. Ja, und zwar: (offene Aufzählung einfügen)

[Frage 4]

Welche möglichen Maßnahmen zur Erhöhung der Sicherheit Ihres Kindes oder Ihrer Kinder fallen Ihnen spontan ein?

**B:** (offene Aufzählung einfügen)

[Frage 5]

Manchmal ist es gar nicht so einfach, Dinge umzusetzen, die man tun möchte. Was macht es für Sie schwerer, Unfällen Ihres Kindes oder Ihrer Kinder vorzubeugen?

**B:** (offene Aufzählung einfügen)

[Frage 6]

Und was würde Ihnen dabei helfen, Unfällen Ihres Kindes oder Ihrer Kinder vorzubeugen?

**B:** (offene Aufzählung einfügen)

[Frage 7]

Wenn Sie sich einmal vorstellen, alle möglichen Maßnahmen zur Erhöhung der Sicherheit Ihres Kindes oder Ihrer Kinder umzusetzen, welche positiven und negativen Folgen hätte das Ihrer Ansicht nach? Bitte wählen Sie die zutreffenden Punkte aus und schreiben Sie einen Kommentar dazu:

**B:** Positive Folgen: (Kommentar einfügen)

Negative Folgen: (Kommentar einfügen)

[Frage 8]

Mit wem sprechen Sie über die Sicherheit Ihres Kindes oder Ihrer Kinder?

**B:** 1. Ich spreche nicht mit anderen darüber.

2. Sonstiges: (offene Aufzählung einfügen)

[Frage 9]

Gibt es weitere Personen oder Personengruppen, an denen Sie sich bei dem Thema Kindersicherheit orientieren?

**B:** (offene Aufzählung einfügen)

[Soziodemographie]

Sind Sie?

**B:** 1. Männlich

2. Weiblich

3. Divers

Wie alt sind Sie?

**B:** (Zahl einfügen)

Wie viele Kinder leben – zumindest zeitweise – mit Ihnen in einem Haushalt?

**B:** (Zahl einfügen)

Wie alt ist das älteste Kind?

**B:** 1. älter als 1 Jahr und zwar (in Jahren):

2. jünger als 1 Jahr und zwar (in Monaten):

Sind Sie alleinerziehend?

**B:** 1. Ja

2. Nein

3. Zum Teil

#### 4. Keine Angabe

Wir möchten gern wissen, ob Sie beruflich oder ehrenamtlich mit dem Thema Kindersicherheit zu tun haben (z. B. weil Sie in der Kinderbetreuung oder in einem medizinischen Beruf tätig sind). Bitte nennen Sie uns daher Ihre beruflichen oder ehrenamtlichen Tätigkeiten.

**B:** (offene Aufzählung einfügen)

Welcher ist der höchste Bildungsabschluss, den Sie haben?

**B:** 1. Keinen Schulabschluss

2. Haupt- oder Volksschulabschluss

3. Mittlerer Reife, Realschule, Polytechnische Oberschule

4. Abitur (Gymnasium, Fachoberschule, erweiterte Oberschule)

5. Fachhochschule, Universität

6. keine Angabe

7. Sonstiges: (offene Aufzählung einfügen)

[Screeener: App-Vorerfahrung]

[Frage 3]

Nutzen Sie Ihr Smartphone nur zum Telefonieren oder nutzen Sie auch Apps? Damit meinen wir diese kleinen Programme auf dem Handy, die sich öffnen, wenn man auf das Symbol tippt. Also zum Beispiel vorinstallierte Apps wie die Wetter-App oder Apps, die man selbst herunterladen kann, wie zum Beispiel WhatsApp oder auch die App Ihrer Bank usw.

**B:**

[Frage 4]

Nehmen Sie bitte einmal Ihr Smartphone zu Hand und werfen einen Blick auf Ihre Apps. Was würden Sie sagen, wie viele davon nutzen Sie regelmäßig?

**B:**

[Frage 5]

Mittlerweile gibt es ja auch im Gesundheitsbereich eine Reihe Apps. Zum Beispiel, um seine Schritte zu zählen oder zum Thema Ernährung oder auch Kalender für Arzttermine etc. Nutzen Sie auch Apps aus diesem Bereich? Wie viele ungefähr?

**B:**

## Kurzfragebogen professionelles Betreuungspersonal

B = befragte Person

[Frage 1]

Wenn Sie gern mehr über das Thema Kindersicherheit erfahren möchten – wo würden Sie gezielt nach solchen Informationen suchen oder wen würden Sie danach fragen? Bitte nennen Sie bis zu drei verschiedene Quellen, das können Medienangebote, Personen oder auch Organisationen sein. Bitte wählen Sie die zutreffenden Punkte aus und schreiben Sie einen Kommentar dazu.

**B:** 1. (offene Aufzählung einfügen)

2. (offene Aufzählung einfügen)

3. (offene Aufzählung einfügen)

[Frage 2]

Man kann ja nicht nur aktiv nach Informationen suchen, sondern auch zufällig darauf stoßen. Wo stoßen Sie besonders häufig auf Informationen zur Sicherheit von Kindern? Bitte nennen Sie bis zu drei verschiedene Quellen. Bitte wählen Sie nur eine der folgenden Antworten aus.

**B:** 1. Ich bin noch nie zufällig auf Informationen zur Sicherheit von Kindern gestoßen.

2. Informationsquellen: (offene Aufzählung einfügen)

[Frage 3]

Gibt es ganz allgemein noch weitere Quellen, von denen Sie sich mehr Informationen zum Thema Kindersicherheit wünschen würden?

**B:** 1. Nein

2. Ja, und zwar: (offene Aufzählung einfügen)

[Frage 4]

Haben Sie im Rahmen Ihrer beruflichen Tätigkeit Weiterbildungsangebote zum Thema Kindersicherheit/Kinderunfälle wahrgenommen?

**B:** 1. Nein

2. Ja, und zwar: (offene Aufzählung einfügen)

[Frage 5]

Welche möglichen Maßnahmen zur Erhöhung der Sicherheit von Kindern fallen Ihnen spontan ein?

**B:** (offene Aufzählung einfügen)

[Frage 6]

Manchmal ist es gar nicht so einfach, Dinge umzusetzen, die man tun möchte. Was macht es für Sie schwerer, Kinderunfällen vorzubeugen?

**B:** (offene Aufzählung einfügen)

[Frage 7]

Und was würde Ihnen dabei helfen, Kinderunfällen vorzubeugen?

**B:** (offene Aufzählung einfügen)

[Frage 8]

Wenn Sie sich einmal vorstellen, alle möglichen Maßnahmen zur Erhöhung der Sicherheit von Kindern umzusetzen, welche positiven und negativen Folgen hätte das Ihrer Ansicht nach? Bitte wählen Sie die zutreffenden Punkte aus und schreiben Sie einen Kommentar dazu.

**B:** 1. positive Folgen: (Kommentar einfügen)

2. negative Folgen: (Kommentar einfügen)

[Frage 9]

Mit wem sprechen Sie über das Thema Kindersicherheit? Bitte wählen Sie nur eine der folgenden Antworten aus.

**B:** 1. Ich spreche nicht mit anderen darüber.

2. Ich spreche mit: (offene Aufzählung einfügen)

[Frage 10]

Gibt es weitere Personen oder Personengruppen, an denen Sie sich bei dem Thema Kindersicherheit orientieren?

**B:** (offene Aufzählung einfügen)

[Soziodemographie]

Sind Sie?

**B:** 1. männlich

2. weiblich

3. divers

Wie alt sind Sie?

**B:** (Zahl einfügen)

Wir möchten gern wissen, inwiefern Sie beruflich oder ehrenamtlich mit dem Thema Kindersicherheit zu tun haben (z. B. weil Sie in der Kinderbetreuung oder in einem medizinischen Beruf tätig sind). Bitte nennen Sie uns daher Ihre beruflichen und ehrenamtlichen Tätigkeiten.

**B:** (offene Aufzählung einfügen)

Haben Sie selbst auch Kinder, und wenn ja, wie viele leben - zumindest zeitweise - mit Ihnen in einem Haushalt?

**B:** 1. Nein ich habe keine Kinder

2. Anzahl: (Zahl einfügen)

Wie alt ist das älteste Kind?

**B:** 1. Falls älter als 1 Jahr, bitte das Alter in Jahren eingeben: (Zahl einfügen)

2. Falls jünger als 1 Jahr, bitte das Alter in Monaten eingeben: (Zahl einfügen)

Welcher ist der höchste allgemeinbildende Schulabschluss, den Sie haben?

**B:** 1. Keinen Schulabschluss

2. Haupt- oder Volksschulabschluss

3. Mittlerer Reife, Realschule, Polytechnische Oberschule

4. Abitur (Gymnasium, Fachoberschule, erweiterte Oberschule)

5. Fachhochschule, Universität

6. keine Angabe

7. Sonstiges: (offene Aufzählung einfügen)

Bitte geben Sie hier einen Namen ein, mit dem Sie im Webcam-Meeting angesprochen werden wollen.

**B:** (Namen einfügen)

[Screener]

[S2: # Jahre in akt. Beruf tätig]

**B:**

[S4: Einstellung ggü. Apps/mobile Anwendung hilfreich zur Pävent. V. Kinderunfällen]

**B:**

## Kurzfragebogen Intermediäre

[Frage 1: Berufliche Erfahrung]

*Welchen beruflichen Bezug haben Sie zum Thema Kindersicherheit? (z. B. Verbandsmitgliedschaft)*

(offene Aufzählung einfügen)

[Frage 2: Informationsquellen]

*Von wem oder woher erhalten Sie Informationen zum Thema Kindersicherheit und an wen geben Sie diese weiter?*

Ich erhalte Informationen von: (offene Aufzählung einfügen)

und gebe diese weiter an: (offene Aufzählung einfügen)

[Frage 3: Kanäle]

*Wenn Sie selbst gern mehr über das Thema Kindersicherheit erfahren möchten – wo würden Sie gezielt nach solchen Informationen suchen oder wen würden Sie danach fragen?*

(offene Aufzählung einfügen)

[Frage 4: Kanäle]

*Und wenn sich Betreuungspersonen über das Thema Kindersicherheit informieren möchten – welche Quellen würden Sie empfehlen?*

(offene Aufzählung einfügen)

[Frage 5: Anlässe]

*Gibt es bestimmte Anlässe oder Zeitpunkte, zu denen Sie - in Ihrer beruflichen Rolle - aktiv nach Informationen zum Thema Kindersicherheit suchen?*

1. Nein
2. Ja, und zwar: (offene Aufzählung einfügen)
3. Weiß nicht

[Frage 6: Anlässe]

*Gibt es bestimmte Anlässe oder Zeitpunkte, zu denen Sie - in Ihrer beruflichen Rolle - Informationen zum Thema Kindersicherheit an die breite Öffentlichkeit oder bestimmte Betreuungspersonen weitergeben?*

1. Nein
2. Ja, und zwar: (offene Aufzählung einfügen)
3. Weiß nicht

[Soziodemographie]

*Sind Sie?*

1. Weiblich
2. Männlich
3. Divers

*Wie alt sind Sie?*

(Zahl einfügen) Jahre

*Haben Sie selbst auch Kinder, und wenn ja, wie viele leben – zumindest zeitweise – mit Ihnen in einem Haushalt?*

1. 2
2. Nein, ich habe keine eigenen Kinder.
3. Anzahl Kinder: (Zahl einfügen)

*Wann ist Ihr ältestes Kind geboren?*

1. Monat (Zahl einfügen)
2. Jahr (Zahl einfügen)

*Welcher ist der höchste Bildungsabschluss, den Sie haben?*

1. Keinen Schulabschluss
2. Haupt- oder Volksschulabschluss
3. Mittlerer Reife, Realschule, Polytechnische Oberschule
4. Abitur (Gymnasium, Fachoberschule, erweiterte Oberschule)
5. Fachhochschule, Universität
6. Sonstiges, und zwar: (offene Aufzählung einfügen)
7. Keine Angabe



## Interviewleitfaden Eltern

Zeitplan, Hauptfragen, mögliche Nachfragen und Gesprächstechniken

Vorab: Technikcheck und Absprache mit welchem Namen die Teilnehmenden im Webcam-Meeting erscheinen

|             |               |
|-------------|---------------|
| ca. 10 Min. | 0:00-<br>0:10 |
|-------------|---------------|

### Einstieg

- *Technikcheck -> wird durch Vorstellungsrunde mit abgedeckt*
- *Vorstellung der Moderation inkl. Ankündigung Co-Moderation -> Vorstellung Hesse*
- *Empfehlungen Diskussionsverhalten (Ausreden lassen, jeden zu Wort kommen lassen, nah an der Fragestellung bleiben, bei Unklarheiten nachfragen; wenn Sie nicht sprechen: Mikro aus; wenn Sie sich zu Wort melden: Mikro an; Möglichkeit, in den Chat zu schreiben)*
- *Aufzeichnung der Daten, Zusicherung von Pseudonymität*
- *Vorstellung der Teilnehmenden: Wer Sie sind und wie Sie angesprochen werden möchten, Anzahl und Alter Kinder*
- *Sozialer Erwünschtheit vorbeugen: persönliche Meinung, jeder hat andere Gegebenheiten in seinem Leben...*
- *Erläuterung der Methode: Wir werden immer wieder genau nachfragen, um sicherzugehen, dass wir Sie richtig verstehen.*
- *Rahmen des Projekts (Forschung von Uni Erfurt und BfR)*
- *Einführung in die Thematik Kindersicherheit: Mit dem Thema Kindersicherheit meinen wir insbesondere die Vermeidung von typischen Haushaltsunfällen, wie zum Beispiel Vergiftungen, Verbrühungen und Stürzen. Außerdem sind auch Verletzungen im Straßenverkehr oder im Zusammenhang mit Sport und Freizeit relevant. Kinder bis 6 Jahre*

|             |               |
|-------------|---------------|
| ca. 30 Min. | 0:10-<br>0:40 |
|-------------|---------------|

### Informationsverhalten

- *Wir hatten Sie in der Vor-Befragung danach gefragt, wo bzw. bei wem Sie sich gezielt zum Thema Kindersicherheit informieren und wo Sie zufällig darauf stoßen. [NEUE FOLIE] Hier sehen Sie eine Übersicht der Antworten. Demnach...*
- *Wir möchten zu Beginn gern noch etwas genauer darüber sprechen, unter welchen Umständen man eher aktiv nach Informationen sucht und wann man zufällig darauf stößt. Wie ist das bei Ihnen, wann stoßen Sie eher zufällig auf Informationen und was sind konkrete Anlässe oder Zeitpunkte, um aktiv nach Informationen zur Sicherheit von Kindern zu suchen?*
- *Überleitung: Einige von Ihnen hatten angegeben, dass Sie auch mobile Medien, wie zum Beispiel Apps nutzen ODER Sie hatten gesagt, dass Sie mobile Medien wie Apps in diesem Zusammenhang bisher kaum genutzt haben. Darauf würde ich nun gern noch etwas genauer eingehen.*
- *[NEUE FOLIE] Zum Beispiel zum Thema Vergiftungen gibt es Apps, in denen man sich darüber informieren kann, welche Unfallrisiken es gibt, wie man diese vermeiden kann und wie man in kritischen Situationen reagieren kann.*
- *Was sind Ihre Gründe dafür, Apps zum Thema Kindergesundheit zu nutzen ODER Was glauben Sie, wie kommt es, dass Sie bisher keine Apps genutzt haben?*

- Wenn Sie mal überlegen, wie Sie sich bisher über das Thema informieren – fallen Ihnen Dinge ein, die künftig auch über das Smartphone möglich wären?
- Was würden Sie sagen, für welche Arten von Informationen kann man auch das Smartphone nutzen?
- *Mögliche konkretisierende Nachfragen, falls Antworten nur zögerlich kommen; dabei Bezug zu schon genannten Punkten der Teilnehmenden herstellen; dabei ggf. auch allgemeiner auf Apps und nicht nur auf spezifische Apps zum Thema Kindersicherheit eingehen*

| <b>Dimensionen (Nützlichkeit und Risiken mobiler Informationen)</b>                                              | <b>Mögliche Nachfrage</b>                                                                                                                                                                                |
|------------------------------------------------------------------------------------------------------------------|----------------------------------------------------------------------------------------------------------------------------------------------------------------------------------------------------------|
| (Un-)Zufriedenheit mit anderen Gesundheitsinformationsquellen                                                    | Sind Sie denn mit Ihren bisherigen Quellen zum Thema Kindersicherheit zufrieden oder gibt es etwas, dass über mobile Medien besser funktionieren könnte? Was könnte das sein?                            |
| Möglichkeit der Anonymität/Vermeidung von Scham                                                                  | Gibt es Themen, die Sie ungern zum Beispiel mit dem Kinderarzt oder der Kinderärztin besprechen und deshalb lieber anonym im Internet/über das Smartphone in Erfahrung bringen möchten? Welche sind das? |
| Wahrgenommene Qualität/Risiken mobiler Informationen/Vertrauen in App-Entwickler<br><br>→ Intermediäre erfragen! | Glauben Sie, man kann den Informationen in einer App zum Thema Kindersicherheit vertrauen oder hätten Sie Bedenken, dass die Informationen nicht ganz richtig sein könnten? Welche Bedenken?             |
| Persönliche Aufgeschlossenheit gegenüber technischen Innovationen und Spaß als Nutzungsmotiv                     | Sind Sie denn generell jemand, der gern neue Apps ausprobiert und Spaß daran hat? Was daran macht Spaß?                                                                                                  |
| <b>Dimensionen (sozialer Einfluss)</b>                                                                           | <b>Mögliche Nachfragen</b>                                                                                                                                                                               |
| Bezugsgruppen für soziale Normen                                                                                 | Gibt es in Ihrem Umfeld Personen, an denen Sie sich orientieren, wenn es um die Nutzung mobiler Medien geht? Wer ist das?                                                                                |
| Sozialer Wert der Nutzung mobiler Medien                                                                         | Glauben Sie, es hat Vorteile, wenn man im Freundeskreis der- oder diejenige ist, die immer gut informiert ist über neue Apps und dergleichen? Inwiefern?                                                 |
| <b>Dimensionen (Barrieren und Fähigkeiten)</b>                                                                   | <b>Mögliche Nachfragen</b>                                                                                                                                                                               |
| Kompetenzen im Umgang mit eHealth allgemein und Health Apps im speziellen                                        | Fühlen Sie sich im Umgang mit Gesundheits-Apps kompetent oder glauben Sie, dass Ihnen an manchen Stellen das notwendige Wissen dafür fehlt? Inwiefern?                                                   |
| Wahrgenommene Barrieren                                                                                          | Was würden Sie sagen, was macht es denn für Sie schwierig, Apps zum Thema Kindersicherheit zu nutzen?                                                                                                    |
| Wahrgenommene erleichternde Faktoren                                                                             | Was würde es für Sie leichter machen, Apps zum Thema Kindersicherheit zu nutzen?                                                                                                                         |
| Kosten                                                                                                           | Spielt es für Sie eine Rolle, ob eine App zum Thema Kindersicherheit kostenpflichtig ist? Inwiefern?                                                                                                     |

|             |               |
|-------------|---------------|
| ca. 10 Min. | 0:40-<br>0:50 |
|-------------|---------------|

#### Präventionsverhalten

- *Überleitung:* Nun haben wir eine Weile darüber gesprochen, wie man sich über Kindersicherheit informieren kann.
- Wenn Sie nochmal daran denken, dass Sie etwas über Kindersicherheit gelesen oder gehört haben, wie ging es Ihnen damit? Gibt es Beispiele dafür, dass Sie etwas gelesen oder gehört haben und dann anders über das Thema Kindersicherheit gedacht haben oder sich seither auch anders verhalten?
- *Hier ggf. Nachfragen zu Vorstellungen und Bezugsgruppen ODER gleich Überleitung*  
Auch wenn man sich darum bemüht, Unfälle vorzubeugen, können sie trotzdem passieren. Wir wollen nun darüber sprechen, wie Sie mit solchen Situationen umgehen.

|             |               |
|-------------|---------------|
| ca. 30 Min. | 0:50-<br>1:20 |
|-------------|---------------|

#### Verhalten in kritischen Situationen [NEUE FOLIE]

- Wie ist das bei Ihnen, gab es in Bezug auf das Thema Kinderunfälle bei Ihnen schon mal kritische Situationen? Wie haben Sie reagiert? Wussten Sie, was Sie tun müssen?
- Was hat Ihnen in dieser kritischen Situation geholfen? Haben Sie in der Situation versucht, an Informationen zu gelangen und wenn ja, wie?
- Haben Sie in einer solchen Situation auch schon mal Ihr Smartphone genutzt? Wenn ja, wozu?
- [NEUE FOLIE] Wir haben ja vorhin auch schon über Apps gesprochen: *Entweder auf die vorher bereits genannten Apps Bezug nehmen ODER Apps zum Thema Kindersicherheit kurz vorstellen.*
- Haben Sie schon mal eine App genutzt, in einer kritischen Situation?
- Unter welchen Umständen könnten Sie sich vorstellen, dass eine App in einer solchen Situation hilfreich sein könnte? *Hier ggf. nicht nur über die Notfallsituation an sich sprechen, sondern ggf. auch nochmal auf die Information im Vorfeld zurückkommen*
- Was macht die Situation denn so schwierig und wie könnten mobile Medien da helfen?
- Wie müsste die App gestaltet sein, damit sie hilfreich ist?
- Wie dürfte die App auf keinen Fall gestaltet sein? („No Gos“)

- *Mögliche konkretisierende Nachfragen, falls Antworten nur zögerlich kommen; dabei Bezug zu schon genannten Punkten der Teilnehmenden herstellen*

| <b>Dimensionen (Was macht die Situation so schwierig?)</b>              | <b>Mögliche Nachfrage</b>                                                                                                                                                                                                  |
|-------------------------------------------------------------------------|----------------------------------------------------------------------------------------------------------------------------------------------------------------------------------------------------------------------------|
| Schwere der Symptome                                                    | Ich könnte mir vorstellen, dass es besonders schwierig ist, wenn es dem Kind sehr schlecht geht. Haben Sie so etwas schon mal erlebt?                                                                                      |
| Hoher Zeitdruck                                                         | Ich könnte mir vorstellen, dass es besonders schwierig ist, wenn man das Gefühl hat, sehr schnell reagieren zu müssen. Haben Sie das schon mal so empfunden?                                                               |
| Mangelndes Vertrauen in Informationsquellen                             | Ich könnte mir vorstellen, dass es in der Situation schwierig sein kann, wenn man nicht weiß, an wen man sich wenden kann, um verlässliche Informationen zu bekommen. Ist Ihnen das schon mal so ergangen?                 |
| Selten auftretende und uneindeutige Situationen                         | Solche kritische Situationen kommen ja zum Glück nicht so oft vor. Daher kann man sie dann aber im Fall der Fälle vielleicht schwer einschätzen. War das für Sie schon mal ein Problem?                                    |
| Mangelnde Erfahrung/Wissen                                              | Da kritische Situationen zum Glück nicht so oft vorkommen, fehlt einem vielleicht die konkrete Erfahrung und man weiß nicht genau, was man tun soll. Ist Ihnen das schon mal so ergangen?                                  |
| Mangelnde Selbstwirksamkeit                                             | Ich könnte mir vorstellen, dass man in kritischen Situationen auch mal das Gefühl hat, dass man sich gar nicht dazu in der Lage sieht, diese Situation zu bewältigen. Haben Sie das schon mal so empfunden?                |
| Panik und Selbstvorwürfe                                                | In so einer kritischen Situation hat man ja vielleicht auch Angst um sein Kind und macht sich vielleicht auch Vorwürfe, dass es überhaupt so weit gekommen ist. Hat Sie das in so einer Situation auch schon mal belastet? |
| <b>Dimensionen (Wie könnten mobile Medien da helfen?)</b>               | <b>Mögliche Nachfragen</b>                                                                                                                                                                                                 |
| Einfache, schnelle Handhabung                                           | Könnte es in so einer Situation hilfreich sein, dass man das Smartphone häufig griffbereit hat? Inwiefern würde das den Umgang mit der Situation erleichtern?                                                              |
| Suchfunktion/Komplexitätsreduktion                                      | Könnte es in so einer Situation hilfreich sein, wenn man die benötigten Informationen in der App über verschiedene Wege finden kann? Wie sollte das Ihrer Meinung nach aussehen?                                           |
| Möglichkeit des Kontakts zu Profis                                      | Ist es für Sie wichtig, in solch' einer kritischen Situation auch Kontakt zu medizinischem Personal aufzunehmen? Inwiefern könnte das auch über mobile Medien möglich sein?                                                |
| Möglichkeit der Probe des Ernstfalls                                    | Würde es Ihnen helfen, wenn Sie so eine kritische Situation im Vorfeld mal durchspielen könnten? Wie könnte das in so einer App aussehen?                                                                                  |
| Interaktive, klare Schritt für Schritt Anweisungen ohne Schuldzuweisung | Würde es Ihnen helfen, wenn Sie über die App Schritt für Schritt erklärt bekommen, was zu tun ist? Wie sollten diese Anweisungen Ihrer Meinung nach umgesetzt werden?                                                      |
| Vertrauensvoller Herausgeber                                            | Ist es für Sie wichtig, von wem so eine App herausgegeben wird? Wem würden Sie dabei vertrauen?                                                                                                                            |

|             |               |
|-------------|---------------|
| ca. 10 Min. | 1:20-<br>1:30 |
|-------------|---------------|

#### *Abschluss*

- [NEUE FOLIE] Ich bitte Sie nun abschließend alle – einer bzw. eine nach dem anderen – um Ihr Fazit. Was nehmen Sie aus dem Gespräch mit und gibt es etwas, das Sie noch anmerken möchten?
- *Dank und Verabschiedung*

## Interviewleitfaden professionelles Betreuungspersonal

Zeitplan, Hauptfragen, mögliche Nachfragen und Gesprächstechniken

Vorab: Technikcheck und Absprache mit welchem Namen die Teilnehmenden im Webcam-Meeting erscheinen

|             |               |
|-------------|---------------|
| ca. 10 Min. | 0:00-<br>0:10 |
|-------------|---------------|

### Einstieg

- Technikcheck -> wird durch Vorstellungsrunde mit abgedeckt
- Vorstellung der Moderation inkl. Ankündigung Co-Moderation -> Vorstellung Hesse
- Empfehlungen Diskussionsverhalten (Ausreden lassen, jeden zu Wort kommen lassen, nah an der Fragestellung bleiben, bei Unklarheiten nachfragen; wenn Sie nicht sprechen: Mikro aus; wenn Sie sich zu Wort melden: Mikro an; Möglichkeit, in den Chat zu schreiben)
- Aufzeichnung der Daten, Zusicherung von Pseudonymität
- Wir möchten Sie gerne in Ihrer Rolle als Betreuungspersonen/Caregiver von Kindern befragen
- Vorstellung der Teilnehmenden: Wer Sie sind und wie Sie angesprochen werden möchten, beruflicher Bezug zum Thema Kindersicherheit, Anzahl und Alter eigener Kinder
- Sozialer Erwünschtheit vorbeugen: persönliche Meinung, jeder hat andere Gegebenheiten in seinem Leben...
- Erläuterung der Methode: Wir werden immer wieder genau nachfragen, um sicherzugehen, dass wir Sie richtig verstehen.
- Rahmen des Projekts (Forschung von Uni Erfurt und BfR)
- Einführung in die Thematik Kindersicherheit: Mit dem Thema Kindersicherheit meinen wir insbesondere die Vermeidung von typischen Haushaltsunfällen, wie zum Beispiel Vergiftungen, Verbrühungen und Stürzen. Außerdem sind auch Verletzungen im Straßenverkehr oder im Zusammenhang mit Sport und Freizeit relevant. Kinder bis 6 Jahre

|             |               |
|-------------|---------------|
| ca. 30 Min. | 0:10-<br>0:40 |
|-------------|---------------|

### Informationsverhalten

- Wir hatten Sie in der Vor-Befragung danach gefragt, wo bzw. bei wem Sie sich gezielt zum Thema Kindersicherheit informieren und wo Sie zufällig darauf stoßen. [NEUE FOLIE] Hier sehen Sie eine Übersicht der Antworten. Demnach...
- Wir möchten zu Beginn gern noch etwas genauer darüber sprechen, unter welchen Umständen man eher aktiv nach Informationen sucht und wann man zufällig darauf stößt. Wie ist das bei Ihnen, wann stoßen Sie eher zufällig auf Informationen und was sind konkrete Anlässe oder Zeitpunkte, um aktiv nach Informationen zur Sicherheit von Kindern zu suchen?
- *Überleitung:* Einige von Ihnen hatten angegeben, dass Sie auch mobile Medien, wie zum Beispiel Apps nutzen ODER Sie hatten gesagt, dass Sie mobile Medien wie Apps in diesem Zusammenhang bisher kaum genutzt haben. Darauf würde ich nun gern noch etwas genauer eingehen.
- [NEUE FOLIE] Zum Beispiel zum Thema Vergiftungen gibt es Apps, in denen man sich darüber informieren kann, welche Unfallrisiken es gibt, wie man diese vermeiden kann und wie man in kritischen Situationen reagieren kann.
- Was sind Ihre Gründe dafür, Apps zum Thema Kindergesundheit zu nutzen ODER Was glauben Sie, wie kommt es, dass Sie bisher keine Apps genutzt haben?

- Wenn Sie mal überlegen, wie Sie sich bisher über das Thema informieren – fallen Ihnen Dinge ein, die künftig auch über das Smartphone möglich wären?
- Was würden Sie sagen, für welche Arten von Informationen kann man auch das Smartphone nutzen?
- *Mögliche konkretisierende Nachfragen, falls Antworten nur zögerlich kommen; dabei Bezug zu schon genannten Punkten der Teilnehmenden herstellen; dabei ggf. auch allgemeiner auf Apps und nicht nur auf spezifische Apps zum Thema Kindersicherheit eingehen*

| <b>Dimensionen (Nützlichkeit und Risiken mobiler Informationen)</b>                                              | <b>Mögliche Nachfrage</b>                                                                                                                                                                                                                                              |
|------------------------------------------------------------------------------------------------------------------|------------------------------------------------------------------------------------------------------------------------------------------------------------------------------------------------------------------------------------------------------------------------|
| (Un-)Zufriedenheit mit anderen Gesundheitsinformationsquellen                                                    | Sind Sie denn mit Ihren bisherigen Quellen zum Thema Kindersicherheit zufrieden oder gibt es etwas, dass über mobile Medien besser funktionieren könnte? Was könnte das sein?                                                                                          |
| Möglichkeit der Anonymität/Vermeidung von Scham                                                                  | Gibt es Themen, die Sie [Gibt es Ihrer Erfahrung nach Themen, die Betreuungspersonen] ungern zum Beispiel mit dem Kinderarzt oder der Kinderärztin besprechen und deshalb lieber anonym im Internet/über das Smartphone in Erfahrung bringen möchten? Welche sind das? |
| Wahrgenommene Qualität/Risiken mobiler Informationen/Vertrauen in App-Entwickler<br><br>➔ Intermediäre erfragen! | Glauben Sie, man kann den Informationen in einer App zum Thema Kindersicherheit vertrauen oder hätten Sie Bedenken, dass die Informationen nicht ganz richtig sein könnten? Welche Bedenken?                                                                           |
| Persönliche Aufgeschlossenheit gegenüber technischen Innovationen und Spaß als Nutzungsmotiv                     | Sind Sie denn generell jemand, der gern neue Apps ausprobiert und Spaß daran hat? Was daran macht Spaß?                                                                                                                                                                |
| <b>Dimensionen (sozialer Einfluss)</b>                                                                           | <b>Mögliche Nachfragen</b>                                                                                                                                                                                                                                             |
| Bezugsgruppen für soziale Normen                                                                                 | Gibt es in Ihrem Umfeld Personen, an denen Sie sich orientieren, wenn es um die Nutzung mobiler Medien geht? Wer ist das?                                                                                                                                              |
| Sozialer Wert der Nutzung mobiler Medien                                                                         | Glauben Sie, es hat Vorteile, wenn man im Freundeskreis der- oder diejenige ist, die immer gut informiert ist über neue Apps und dergleichen? Inwiefern?                                                                                                               |
| <b>Dimensionen (Barrieren und Fähigkeiten)</b>                                                                   | <b>Mögliche Nachfragen</b>                                                                                                                                                                                                                                             |
| Kompetenzen im Umgang mit eHealth allgemein und Health Apps im speziellen                                        | Fühlen Sie sich im Umgang mit Gesundheits-Apps kompetent oder glauben Sie, dass Ihnen an manchen Stellen das notwendige Wissen dafür fehlt? Inwiefern?                                                                                                                 |
| Wahrgenommene Barrieren                                                                                          | Was würden Sie sagen, was macht es denn für Sie schwierig, Apps zum Thema Kindersicherheit zu nutzen?                                                                                                                                                                  |
| Wahrgenommene erleichternde Faktoren                                                                             | Was würde es für Sie leichter machen, Apps zum Thema Kindersicherheit zu nutzen?                                                                                                                                                                                       |
| Kosten                                                                                                           | Spielt es für Sie eine Rolle, ob eine App zum Thema Kindersicherheit kostenpflichtig ist? Inwiefern?                                                                                                                                                                   |

|             |               |
|-------------|---------------|
| ca. 10 Min. | 0:40-<br>0:50 |
|-------------|---------------|

#### Präventionsverhalten

- **Überleitung:** Nun haben wir eine Weile darüber gesprochen, wie man sich über Kindersicherheit informieren kann.
- **Wenn Sie nochmal daran denken, dass Sie etwas über Kindersicherheit gelesen oder gehört haben, wie ging es Ihnen damit? Gibt es Beispiele dafür, dass Sie etwas gelesen oder gehört haben und dann anders über das Thema Kindersicherheit gedacht haben oder sich seither auch anders verhalten?**
- *Hier ggf. Nachfragen zu Vorstellungen und Bezugsgruppen ODER gleich Überleitung*  
Auch wenn man sich darum bemüht, Unfälle vorzubeugen, können sie trotzdem passieren. Wir wollen nun darüber sprechen, wie Sie mit solchen Situationen umgehen.

|             |               |
|-------------|---------------|
| ca. 30 Min. | 0:50-<br>1:20 |
|-------------|---------------|

#### Verhalten in kritischen Situationen [NEUE FOLIE]

- **Wie ist das bei Ihnen, gab es in Bezug auf das Thema Kinderunfälle bei Ihnen schon mal kritische Situationen? Wie haben Sie reagiert? Wussten Sie, was Sie tun müssen?**  
*Wenn private Erfahrungen geteilt werden auch ok; anschließend Gespräch wieder auf beruflichen Kontext zurückführen.*
- Was hat Ihnen in dieser kritischen Situation geholfen? Haben Sie in der Situation versucht, an Informationen zu gelangen und wenn ja, wie?
- Haben Sie in einer solchen Situation auch schon mal Ihr Smartphone genutzt? Wenn ja, wozu?
- [NEUE FOLIE] Wir haben ja vorhin auch schon über Apps gesprochen: *Entweder auf die vorher bereits genannten Apps Bezug nehmen ODER Apps zum Thema Kindersicherheit kurz vorstellen.*
- Haben Sie schon mal eine App genutzt, in einer kritischen Situation?
- **Unter welchen Umständen könnten Sie sich vorstellen, dass eine App in einer solchen Situation hilfreich sein könnte?** *Hier ggf. nicht nur über die Notfallsituation an sich sprechen, sondern ggf. auch nochmal auf die Information im Vorfeld zurückkommen*
- Was macht die Situation denn so schwierig und wie könnten mobile Medien da helfen?
- Wie müsste die App gestaltet sein, damit sie hilfreich ist?
- Wie dürfte die App auf keinen Fall gestaltet sein? („No Gos“)



- *Mögliche konkretisierende Nachfragen, falls Antworten nur zögerlich kommen; dabei Bezug zu schon genannten Punkten der Teilnehmenden herstellen*

| <b>Dimensionen (Was macht die Situation so schwierig?)</b>              | <b>Mögliche Nachfrage</b>                                                                                                                                                                                                  |
|-------------------------------------------------------------------------|----------------------------------------------------------------------------------------------------------------------------------------------------------------------------------------------------------------------------|
| Schwere der Symptome                                                    | Ich könnte mir vorstellen, dass es besonders schwierig ist, wenn es dem Kind sehr schlecht geht. Haben Sie so etwas schon mal erlebt?                                                                                      |
| Hoher Zeitdruck                                                         | Ich könnte mir vorstellen, dass es besonders schwierig ist, wenn man das Gefühl hat, sehr schnell reagieren zu müssen. Haben Sie das schon mal so empfunden?                                                               |
| Mangelndes Vertrauen in Informationsquellen                             | Ich könnte mir vorstellen, dass es in der Situation schwierig sein kann, wenn man nicht weiß, an wen man sich wenden kann, um verlässliche Informationen zu bekommen. Ist Ihnen das schon mal so ergangen?                 |
| Selten auftretende und uneindeutige Situationen                         | Solche kritische Situationen kommen ja zum Glück nicht so oft vor. Daher kann man sie dann aber im Fall der Fälle vielleicht schwer einschätzen. War das für Sie schon mal ein Problem?                                    |
| Mangelnde Erfahrung/Wissen                                              | Da kritische Situationen zum Glück nicht so oft vorkommen, fehlt einem vielleicht die konkrete Erfahrung und man weiß nicht genau, was man tun soll. Ist Ihnen das schon mal so ergangen?                                  |
| Mangelnde Selbstwirksamkeit                                             | Ich könnte mir vorstellen, dass man in kritischen Situationen auch mal das Gefühl hat, dass man sich gar nicht dazu in der Lage sieht, diese Situation zu bewältigen. Haben Sie das schon mal so empfunden?                |
| Panik und Selbstvorwürfe                                                | In so einer kritischen Situation hat man ja vielleicht auch Angst um sein Kind und macht sich vielleicht auch Vorwürfe, dass es überhaupt so weit gekommen ist. Hat Sie das in so einer Situation auch schon mal belastet? |
| <b>Dimensionen (Wie könnten mobile Medien da helfen?)</b>               | <b>Mögliche Nachfragen</b>                                                                                                                                                                                                 |
| Einfache, schnelle Handhabung                                           | Könnte es in so einer Situation hilfreich sein, dass man das Smartphone häufig griffbereit hat? Inwiefern würde das den Umgang mit der Situation erleichtern?                                                              |
| Suchfunktion/Komplexitätsreduktion                                      | Könnte es in so einer Situation hilfreich sein, wenn man die benötigten Informationen in der App über verschiedene Wege finden kann? Wie sollte das Ihrer Meinung nach aussehen?                                           |
| Möglichkeit des Kontakts zu Profis                                      | Ist es für Sie wichtig, in solch' einer kritischen Situation auch Kontakt zu medizinischem Personal aufzunehmen? Inwiefern könnte das auch über mobile Medien möglich sein?                                                |
| Möglichkeit der Probe des Ernstfalls                                    | Würde es Ihnen helfen, wenn Sie so eine kritische Situation im Vorfeld mal durchspielen könnten? Wie könnte das in so einer App aussehen?                                                                                  |
| Interaktive, klare Schritt für Schritt Anweisungen ohne Schuldzuweisung | Würde es Ihnen helfen, wenn Sie über die App Schritt für Schritt erklärt bekommen, was zu tun ist? Wie sollten diese Anweisungen Ihrer Meinung nach umgesetzt werden?                                                      |
| Vertrauensvoller Herausgeber                                            | Ist es für Sie wichtig, von wem so eine App herausgegeben wird? Wem würden Sie dabei vertrauen?                                                                                                                            |

|             |               |
|-------------|---------------|
| ca. 10 Min. | 1:20-<br>1:30 |
|-------------|---------------|

#### *Abschluss*

- [NEUE FOLIE] Ich bitte Sie nun abschließend alle – einer bzw. eine nach dem anderen – um Ihr Fazit. Was nehmen Sie aus dem Gespräch mit und gibt es etwas, das Sie noch anmerken möchten?
- *Dank und Verabschiedung*

## Interviewleitfaden Intermediäre

|             |               |
|-------------|---------------|
| ca. 10 Min. | 0:00-<br>0:10 |
|-------------|---------------|

### Einstieg

- *Technikcheck -> wird durch Vorstellungsrunde mit abgedeckt*
- *Vorstellung der Moderation inkl. Ankündigung Co-Moderation -> Vorstellung Hesse*
- *Empfehlungen Diskussionsverhalten (Ausreden lassen, jeden zu Wort kommen lassen, nah an der Fragestellung bleiben, bei Unklarheiten nachfragen; wenn Sie nicht sprechen: Mikro aus; wenn Sie sich zu Wort melden: Mikro an; Möglichkeit, in den Chat zu schreiben)*
- *Aufzeichnung der Daten, Zusicherung von Pseudonymität*
- *Interviews mit Betreuungspersonen (Eltern sowie medizinisches und pädagogisches Personal) bereits geführt; nun benötigen wir noch die Expertise der Intermediäre [Einordnung in Gruppe Intermediäre mit/ohne direkten Elternkontakt transparent machen]*

Vorstellung der Teilnehmenden: Wer Sie sind und wie Sie angesprochen werden möchten; beruflicher Bezug zu Kinderunfällen (Verbandsmitgliedschaft etc.); Anzahl und Alter eigener Kinder

- *Sozialer Erwünschtheit vorbeugen: persönliche Meinung, jeder hat andere Gegebenheiten in seinem beruflichen Umfeld...*
- *Erläuterung der Methode: Wir werden immer wieder genau nachfragen, um sicherzugehen, dass wir Sie richtig verstehen.*
- *Rahmen des Projekts (Forschung von Uni Erfurt und BfR)*
- *Einführung in die Thematik Kindersicherheit: Mit dem Thema Kindersicherheit meinen wir insbesondere die Vermeidung von typischen Haushaltsunfällen, wie zum Beispiel Vergiftungen, Verbrühungen und Stürzen. Außerdem sind auch Verletzungen im Straßenverkehr oder im Zusammenhang mit Sport und Freizeit relevant. Kinder bis 6 Jahre*

|             |               |
|-------------|---------------|
| ca. 20 Min. | 0:10-<br>0:30 |
|-------------|---------------|

### Präventionsverhalten

*Insbesondere bei kleinen Kindern ist das Verhalten der Betreuungspersonen entscheidend, um die Sicherheit von Kindern zu gewährleisten.*

- *Aus Ihrer Erfahrung heraus – was macht es für Betreuungspersonen schwer, Kinderunfällen vorzubeugen? Was würde Betreuungspersonen dabei helfen, Kinderunfällen vorzubeugen?*
- *Welche Probleme und Szenarien werden an Sie herangetragen?*
- *Gibt es Personengruppen, bei denen besonders häufig Kinderunfälle passieren? Welche sind das und warum fällt es diesen schwer, Kinderunfällen vorzubeugen?*
- *Falls nicht angesprochen: Welchen Beitrag kann die Aufklärung von Betreuungspersonen über Unfallrisiken und Präventionsmöglichkeiten zur Sicherheit von Kindern leisten? (z. B. Risikowahrnehmung erhöhen, Handlungskompetenz stärken)*

|             |               |
|-------------|---------------|
| ca. 30 Min. | 0:30-<br>1:00 |
|-------------|---------------|

### *Kommunikationsverhalten*

*Wir haben nun bereits darüber gesprochen, dass die Aufklärung über Unfallrisiken und Präventionsmöglichkeiten ein wichtiger Aspekt der Unfallprävention ist. Dabei können ganz unterschiedliche Zielgruppen und Informationswege eine Rolle spielen.*

- Wie würden Sie Ihre Rolle in diesem Zusammenhang beschreiben?

### **Anlässe**

[FOLIE: Anlässe des Informations- und Kommunikationsverhaltens]

In der Vorbefragung hatten Sie bereits einige Anlässe bzw. Zeitpunkte genannt, zu denen Sie sich selbst bzw. andere zum Thema Kindersicherheit informieren. Darunter sind sowohl Anlässe mit einer gewissen Regelmäßigkeiten als auch Anlässe durch neue Ereignisse.

- Mich interessieren diese Ereignisse, die Sie dazu veranlassen, abseits der etablierten Zeitpläne, an die breite Öffentlichkeit oder bestimmte Betreuungspersonen heranzutreten. Können Sie das nochmal – möglicherweise anhand eines Beispiels – für mich ausführen?

### **Netzwerk**

[FOLIE: Netzwerk]

In der Vorbefragung haben Sie einige Akteure aufgezählt, von denen Sie Informationen erhalten und welche Zielgruppen Sie selbst adressieren.

- Gibt es Zielgruppen, die von Ihnen und anderen Akteuren nur schwer erreicht werden können? Welche sind das und wie könnte man diese erreichen?

### **Inhalte**

Wir haben nun bereits über unterschiedliche Zielgruppe gesprochen.

- Welche Inhalte kommunizieren Sie an die verschiedenen Zielgruppen und wie bereiten Sie diese auf?
- Unterscheidet sich die Aufbereitung je nach Kanal? Welche sind das?

### **Kanäle**

[FOLIE: Informationsquellen]

In der Vorbefragung haben Sie eine Reihe unterschiedlicher Quellen genannt, die Sie für empfehlenswert halten.

- Was unterscheidet Quellen oder Materialien, die Sie weiterempfehlen, von jenen, die Sie nicht weitergeben würden?
- Was wären für Sie Gründe, etwas an Ihrer aktuellen Medienauswahl zu ändern und andere Quellen zu empfehlen oder andere Kommunikationskanäle zu nutzen?

Einige von Ihnen hatten angegeben, dass Sie auch mobile Medien, wie zum Beispiel Apps nutzen ODER Unter denen von Ihnen genannten Kanälen kamen mobile Medien wie Apps nicht oder kaum vor. Darauf würde ich nun gern noch etwas genauer eingehen.

[FOLIE: Beispiel-Apps] Zum Beispiel zum Thema Vergiftungen gibt es Apps, in denen man sich darüber informieren kann, welche Unfallrisiken es gibt, wie man diese vermeiden kann und wie man in kritischen Situationen reagieren kann.

- **Wie bewerten Sie die Suche über das Smartphone oder die Nutzung spezieller Apps, um sich über Kindersicherheit und Kinderunfälle zu informieren?**
- *Wem* würden Sie die Nutzung solcher Apps empfehlen?
- Was spricht aus Ihrer Sicht *für und gegen* die Nutzung solcher Apps?
- Für *welche Arten von Informationen* sind Apps geeignet?
- Wie müssten die Apps gestaltet sein? (*Dos und No Gos*)
- *Von wem* sollte eine solche App herausgegeben werden?
- *Wen* könnte man über eine solche App *erreichen*?

|             |               |
|-------------|---------------|
| ca. 20 Min. | 1:00-<br>1:20 |
|-------------|---------------|

#### *Verhalten in kritischen Situationen*

[FOLIE: Notfall-Apps] Einige Apps enthalten auch konkrete Informationen und Nutzungsmöglichkeiten für kritische Situationen.

- **Unter welchen Umständen könnten Sie sich vorstellen, dass eine App in einer solchen Situation hilfreich sein könnte?**
- Wie müsste eine App gestaltet sein, damit sie in einer solchen Situation hilfreich ist?
- Wenn auch nicht in der kritischen Situation selbst – könnte eine App bei der Vorbereitung auf kritische Situationen hilfreich sein?

|             |               |
|-------------|---------------|
| ca. 10 Min. | 1:20-<br>1:30 |
|-------------|---------------|

#### *Abschluss*

- Ich bitte Sie nun abschließend alle – einer bzw. eine nach dem anderen – um Ihr Fazit. Was nehmen Sie aus dem Gespräch mit und gibt es etwas, das Sie noch anmerken möchten?
- *Dank und Verabschiedung*
- *Nachfragen, ob alle, die das möchten, Angaben zu Incentivierung gemacht haben*
